# Supplementary material
Source: Royal Society of Chemistry journal article supplement (doi:10.1039/d6ay00578k)
Supplement: d6ay00578k1.pdf [file d6ay00578k1.pdf]

## Supplemented material

### Supplemented experimental section

#### *PCR detection of miRNA-155 (Supplementary Methods)*

Synthetic miRNA-155 and serum-derived miRNA samples were reverse transcribed using a stem-loop primer specific for miRNA-155 and M-MLV reverse transcriptase (Thermo Fisher) at 42 °C for 30 min. The resulting cDNA was then amplified by qPCR using a miRNA-specific forward primer, a universal reverse primer, and SYBR Green Master Mix on a real-time PCR system (Bio-Rad CFX96). The thermal cycling protocol was: 95 °C for 10 min, followed by 40 cycles of 95 °C for 15 s and 60 °C for 1 min. Standard curves were generated from serial dilutions of synthetic miRNA-155, and all samples were measured in triplicate.

**Supplementary Table 1.** Single-stranded DNA and RNA sequences used in this study

| Title            | Sequences (5' to 3')                                                              |
|------------------|-----------------------------------------------------------------------------------|
| Allosteric probe | TTC CCC CTA TCA CGT CCA GAA GCC CTA TAG TGA GTC<br>GTA TTA AGG GCT TC             |
| Assistance probe | TTA ATG CTA ATC GGT CCA GAA GCC CGC TGA GGT<br>AGC ATT AAG AAG CCC T              |
| crRNA            | GGA CCA CCC CAA AAA UGA AGG GGA CUA AAA CUG<br>GUC AAA CUG CAU AGG UAG UCC AGA AG |
| Reporter         | FAM/UUU UU/BHQ1/                                                                  |
| miRNA-155        | GGG CUC UGG ACG UGA UAG GGG UU                                                    |
| miRNA-10b        | UAC CCU GUA GAA CCG AAU UUG UG                                                    |
| miRNA-21         | UAG CUU AUC AGA CUG AUG UUG A                                                     |

**Supplementary Table S2.** A brief comparison of the method with former CRISPR/Cas system -based miRNA detection methods.

| Methods    | Mechanism                                                                                  | LOD    | Reaction duration | Ref |
|------------|--------------------------------------------------------------------------------------------|--------|-------------------|-----|
| The method | DNA polymerase/ endonuclease assisted signal amplification; trans-cleavage of Cas13a/crRNA | 548 aM | 60 min            |     |
| RACE       | RCA                                                                                        | 90 fM  | 120 min           | 1   |
| Cas12a     | RCA; trans-cleavage of Cas12a/crRNA                                                        | 47 fM  | 100 min           | 2   |

### References:

1. Wang, R.; Zhao, X.; Chen, X.; Qiu, X.; Qing, G.; Zhang, H.; Zhang, L.;

Hu, X.; He, Z.; Zhong, D.; Wang, Y.; Luo, Y., Rolling Circular Amplification (RCA)-Assisted CRISPR/Cas9 Cleavage (RACE) for Highly Specific Detection of Multiple Extracellular Vesicle MicroRNAs. *Anal. Chem.* **2020**, *92* (2), 2176-2185.

2. Zhang, G. Z., L.; Tong, J.; Zhao, X.; Ren, J., CRISPR-Cas12a enhanced rolling circle amplification method for ultrasensitive miRNA detection. *Microchem. J.* **2020**, *158* (2020), 105239.

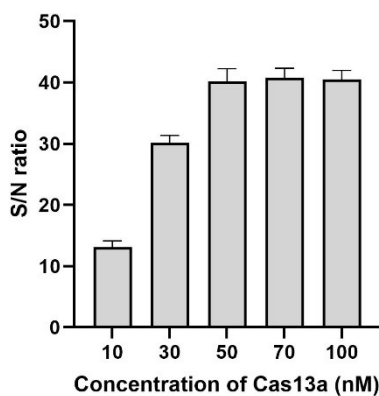

**Figure S1.** Signal-to-background (S/N ratio) of the method when detecting miRNA with different concentrations of Cas13a concentration.
